# Supplementary material
Source: PubMed Central journal article supplement (PMC8134039)

**Supplemental Table.** Patient clinical and demographic characteristics between SBRT and EBRT

|                                             | Statistics     | Level                | Radiation group |               | Parametric P-value* |
|---------------------------------------------|----------------|----------------------|-----------------|---------------|---------------------|
|                                             |                |                      | SBRT N=1157     | EBRT N=48598  |                     |
| Age                                         | Median (range) |                      | 70 (43-90)      | 71 (40-90)    | <b>0.002</b>        |
| Race/Ethnicity                              | N (Col %)      | White                | 862 (75.48)     | 36079 (74.98) | 0.559               |
|                                             | N (Col %)      | Black                | 205 (17.95)     | 8392 (17.44)  |                     |
|                                             | N (Col %)      | Hispanic             | 41 (3.59)       | 2126 (4.42)   |                     |
|                                             | N (Col %)      | Other                | 34 (2.98)       | 1522 (3.16)   |                     |
| Facility Type                               | N (Col %)      | Non-academic program | 535 (46.24)     | 33609 (69.16) | <b>&lt;.001</b>     |
|                                             | N (Col %)      | Academic program     | 622 (53.76)     | 14989 (30.84) |                     |
| Zip Code Median Household Income            | N (Col %)      | <\$46,000            | 526 (47.22)     | 28838 (61.14) | <b>&lt;.001</b>     |
|                                             | N (Col %)      | >=\$46,000           | 588 (52.78)     | 18329 (38.86) |                     |
| Zip Code Percent Without High School Degree | N (Col %)      | >=29%                | 194 (17.41)     | 8134 (17.25)  | <b>&lt;.001</b>     |
|                                             | N (Col %)      | 20-28.9%             | 218 (19.57)     | 11124 (23.59) |                     |
|                                             | N (Col %)      | 14-19.9%             | 226 (20.29)     | 11591 (24.58) |                     |
|                                             | N (Col %)      | < 14%                | 476 (42.73)     | 16311 (34.59) |                     |
| Year of diagnosis                           | N (Col %)      | 2004-06              | 111 (9.59)      | 9737 (20.04)  | <b>&lt;.001</b>     |
|                                             | N (Col %)      | 2007-09              | 198 (17.11)     | 10252 (21.1)  |                     |
|                                             | N (Col %)      | 2010-12              | 341 (29.47)     | 11786 (24.25) |                     |
|                                             | N (Col %)      | 2013-16              | 507 (43.82)     | 16823 (34.62) |                     |

|                                 | Statistics | Level                          | Radiation group |               | Parametric<br>P-value* |
|---------------------------------|------------|--------------------------------|-----------------|---------------|------------------------|
|                                 |            |                                | SBRT N=1157     | EBRT N=48598  |                        |
| Insurance Status                | N (Col %)  | Not Insured                    | 22 (1.9)        | 908 (1.87)    | 0.106                  |
|                                 | N (Col %)  | Private Insurance/Managed Care | 321 (27.74)     | 12479 (25.68) |                        |
|                                 | N (Col %)  | Medicaid                       | 33 (2.85)       | 1651 (3.4)    |                        |
|                                 | N (Col %)  | Medicare                       | 706 (61.02)     | 31066 (63.92) |                        |
|                                 | N (Col %)  | Other Government               | 52 (4.49)       | 1827 (3.76)   |                        |
|                                 | N (Col %)  | Insurance Status Unknown       | 23 (1.99)       | 667 (1.37)    |                        |
| Facility Location (Geographic)  | N (Col %)  | Northeast                      | 383 (33.1)      | 11574 (23.82) | <.001                  |
|                                 | N (Col %)  | South                          | 384 (33.19)     | 16443 (33.83) |                        |
|                                 | N (Col %)  | Midwest                        | 224 (19.36)     | 12924 (26.59) |                        |
|                                 | N (Col %)  | West                           | 166 (14.35)     | 7657 (15.76)  |                        |
| Distance to Treatment Facility  | N (Col %)  | 0-25 miles                     | 794 (68.86)     | 39758 (82.13) | <.001                  |
|                                 | N (Col %)  | 25-50 miles                    | 169 (14.66)     | 5508 (11.38)  |                        |
|                                 | N (Col %)  | 50+ miles                      | 190 (16.48)     | 3145 (6.5)    |                        |
| Charlson-Deyo comorbidity score | N (Col %)  | 0                              | 963 (83.23)     | 41034 (84.44) | 0.265                  |
|                                 | N (Col %)  | 1+                             | 194 (16.77)     | 7564 (15.56)  |                        |
| Facility Location (Urban/Rural) | N (Col %)  | Metro/Urban                    | 1093 (99)       | 46193 (97.34) | <.001                  |
|                                 | N (Col %)  | Rural                          | 11 (1)          | 1261 (2.66)   |                        |

|                 | Statistics | Level     | Radiation group |               | Parametric P-value* |
|-----------------|------------|-----------|-----------------|---------------|---------------------|
|                 |            |           | SBRT N=1157     | EBRT N=48598  |                     |
| T stage         | N (Col %)  | T1-2      | 1025 (88.59)    | 38873 (79.99) | <.001               |
|                 | N (Col %)  | T3-4      | 132 (11.41)     | 9725 (20.01)  |                     |
| Receipt of ADT^ | N (Col %)  | No        | 653 (56.44)     | 8835 (18.18)  | <.001               |
|                 | N (Col %)  | Yes       | 504 (43.56)     | 39763 (81.82) |                     |
| PSA             | N (Col %)  | >0, <=10  | 391 (33.79)     | 20039 (41.24) | <.001               |
|                 | N (Col %)  | >10, <=20 | 182 (15.73)     | 9392 (19.33)  |                     |
|                 | N (Col %)  | >20       | 584 (50.48)     | 19163 (39.43) |                     |
| Gleason score   | N (Col %)  | 6-7       | 514 (44.43)     | 13176 (27.11) | <.001               |
|                 | N (Col %)  | 8-10      | 643 (55.57)     | 35422 (72.89) |                     |

\* The parametric p-value is calculated by ANOVA for numerical covariates and chi-square test for categorical covariates.

^ ADT: Androgen deprivation therapy

**Supplemental Figure.** National crude rate of SBRT use shown as a percentage among patients who received external radiation (SBRT or EBRT) as their initial definitive therapy for localized high risk prostate cancer in (a) entire cohort, (b) men with ADT omitted, and (c) men with PSA > 20 as the only qualifying high risk feature.

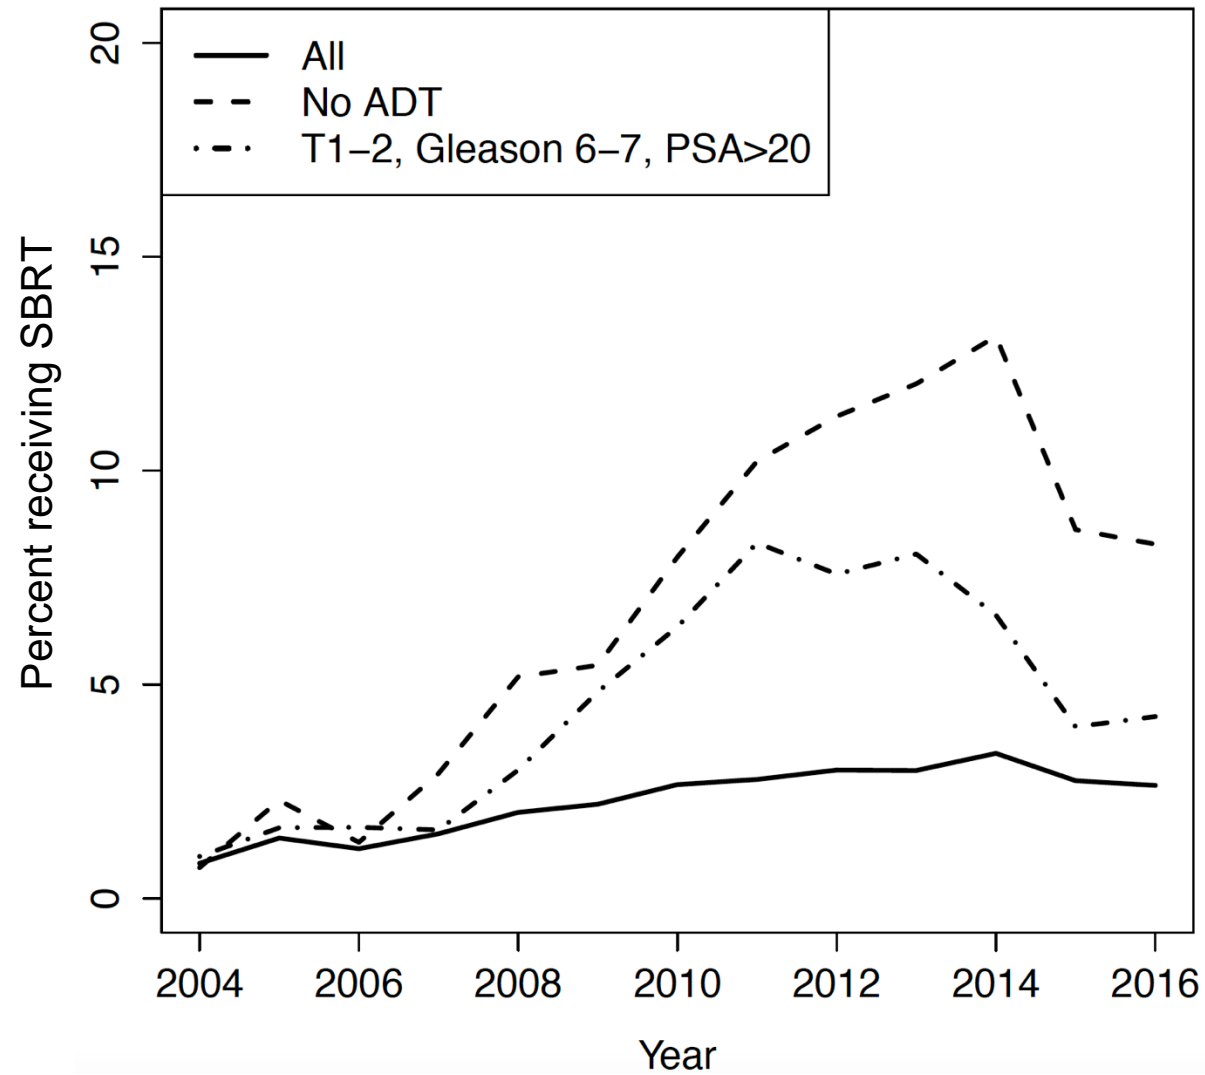

Supplement: 41391_2020_300_MOESM1_ESM.pdf [file 41391_2020_300_MOESM1_ESM.pdf]
